# Supplementary material for: Quercetin Alleviates Oxidative Damage by Activating Nuclear Factor Erythroid 2-Related Factor 2 Signaling in Porcine Enterocytes
Source: MDPI journal article supplement (doi:10.3390/nu13020375), 2021-01-26
Supplement: s1 [file s1]

Supplementary Materials

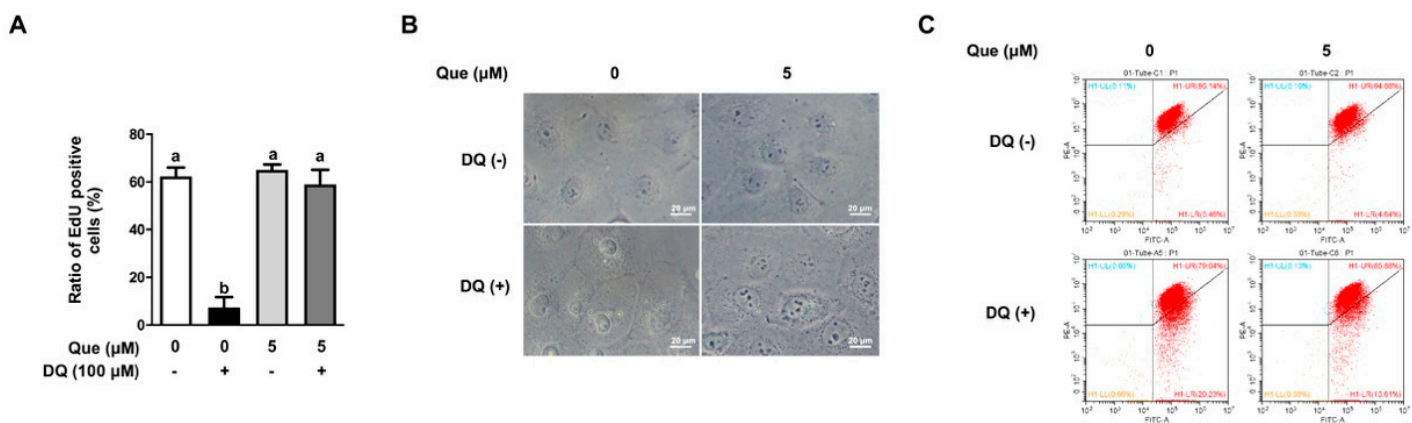

**Figure S1.** Proliferation, morphology, and mitochondrial membrane potential of IPEC-1 cells. IPEC-1 cells were pretreated with 5  $\mu$ M quercetin for 24 h and then exposed to 100  $\mu$ M diquat for 6 h. (A) Ratio of EdU positive cells was quantified and analyzed. (B) Cell morphology was observed by microscope, and images were taken under a microscope (magnification  $\times 400$ ). (C) Cells were stained by JC-1 and mitochondrial membrane potential were analyzed by flow cytometry. Representative experimental results were repeated in three independent experiments and values are means  $\pm$  SEMs,  $n=3$ . Means without a common letter are considered as a significant difference,  $p < 0.05$ .

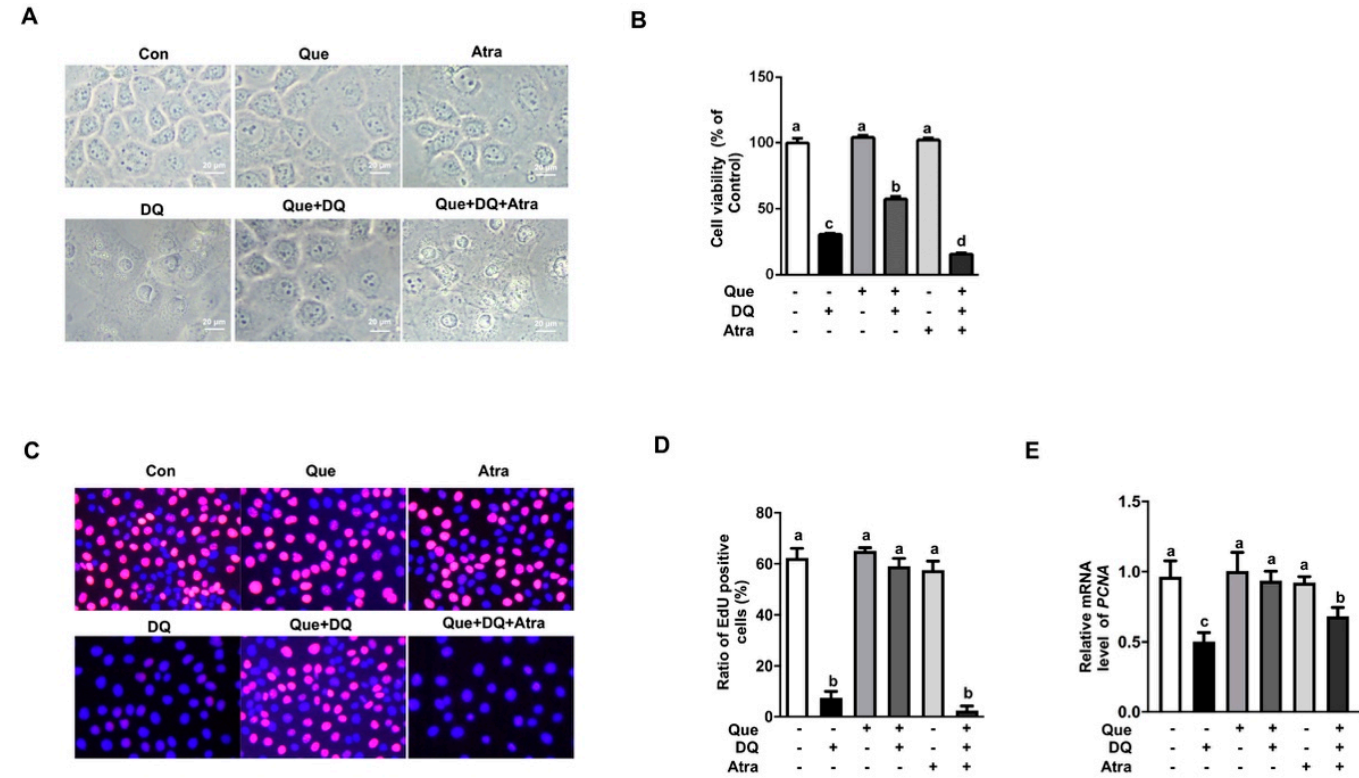

**Figure S2.** Morphology, viability, proliferation, and mitochondrial membrane potential of IPEC-1 cells. IPEC-1 cells pretreated with or without quercetin (5  $\mu$ M, 24 h) were exposed to 100  $\mu$ M diquat for 6 h in the presence or absence of Atra (1  $\mu$ M). (A) Cell morphology, (B) cell viability, (C)

cell proliferation, (D) ratio of EdU positive cells and (E) mRNA level of *PCNA* were assessed. Representative experimental results were repeated in three independent experiments and values are means  $\pm$  SEMs,  $n=3$ . Means without a common letter are considered as a significant difference,  $p < 0.05$ .
